# Supplementary material for: Synthesis and properties of indigo based donor–acceptor conjugated polymers
Source: Royal Society of Chemistry journal article supplement (doi:10.1039/c3tc32276a), 2014-01-01
Supplement: c3tc32276a1.pdf [file c3tc32276a1.pdf]

## **Supplementary Information**

# **Synthesis and properties of indigo based donor-acceptor conjugated polymers**

**Chang Guo, Bin Sun, Jesse Quinn, Zhuangqing Yan and Yuning Li\***

Department of Chemical Engineering/Waterloo Institute for Nanotechnology (WIN), University of  
Waterloo, 200 University Avenue West, Waterloo, Ontario, Canada N2L 3G1; Fax: +1 519-888-4347;

Tel: +1 519-888-4567 ext. 31105; Email: [yuning.li@uwaterloo.ca](mailto:yuning.li@uwaterloo.ca).

- 1. Computer simulations of model compounds**
- 2. Additional data**
- 3. References**

# Supplementary Information

## 1. Computer simulations of model compounds

Geometry optimization of model compounds (see Table S1 and Figures 2, S1-S4) was performed based on the density functional theory (DFT) using the B3LYP hybrid function<sup>1</sup> and the 6-31G\* basis set. GaussView 5.0 software<sup>2</sup> was used to draw the Lowest Unoccupied Molecular Orbitals (LUMO) and the Highest Occupied Molecular Orbitals (HOMO). Calculations were performed on the Shared Hierarchical Academic Research Computer Network (SHARCNET) of Canada using the Gaussian 09W package<sup>3</sup>.

## 2. Additional data

**Table S1.** Summary of computer simulation results of model compounds.

| Entry | Model compounds <sup>a</sup> | $\varphi_1, ^\circ$ | $\varphi_2, ^\circ$ | $\varphi_3, ^\circ$ | $E_{\text{HOMO}}, \text{eV}$ | $E_{\text{LUMO}}, \text{eV}$ | $E_g, \text{eV}$ |
|-------|------------------------------|---------------------|---------------------|---------------------|------------------------------|------------------------------|------------------|
| 1     | IDH-BT-IDH-BT                | 0                   | 24                  | 16                  | -5.28                        | -2.92                        | 2.37             |
| 2     | IDMe-BT-IDMe-BT              | 29                  | 24                  | 1                   | -5.13                        | -2.80                        | 2.33             |
| 3     | IDCOMe-BT-IDCOMe-BT          | 23                  | 24                  | 15                  | -5.60                        | -3.00                        | 2.60             |
| 4     | IIDH-BT-IIDH-BT              | 11                  | 19                  | 16                  | -5.09                        | -2.95                        | 2.14             |
| 5     | IIDMe-BT-IIDMe-BT            | 11                  | 20                  | 5                   | -5.03                        | -2.89                        | 2.14             |
| 6     | IIDCOMe-BT-IIDCOMe-BT        | 17                  | 22                  | 14                  | -5.32                        | -3.30                        | 2.02             |

<sup>a</sup> Structures of IDCOMe-BT-IDCOMe-BT and IIDMe-BT-IIDMe-BT are shown in Figure 2 in the main text, while the structures of other model compounds are shown Figures S1-S4.

## Supplementary Information

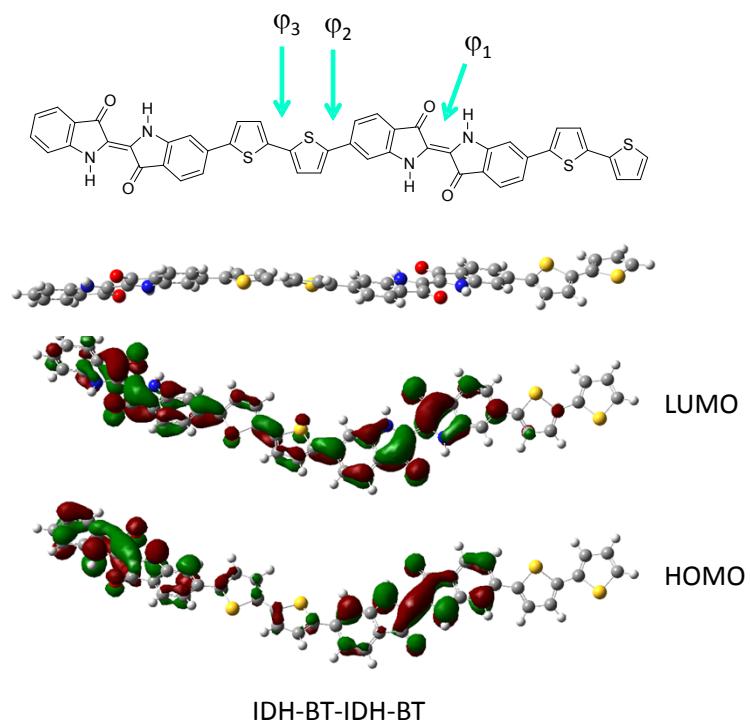

**Figure S1.** The chemical structure, geometry, LUMO orbital, and HOMO orbital of a model dimer IDH-BT-IDH-BT obtained by performing density functional theory (DFT) calculations with B3LYP 6-31G\*.

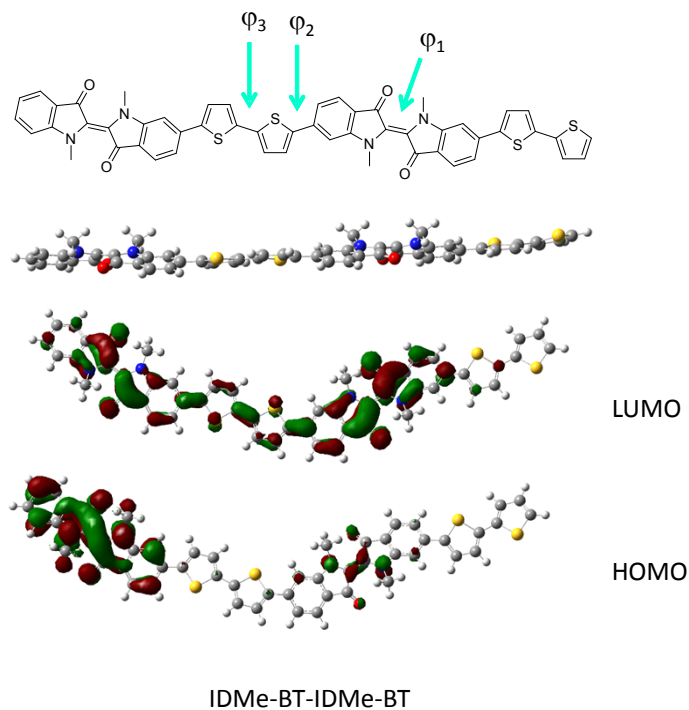

**Figure S2.** The chemical structure, geometry, LUMO orbital, and HOMO orbital of a model dimer IDMe-BT-IDMe-BT obtained by performing density functional theory (DFT) calculations with B3LYP 6-31G\*.

## Supplementary Information

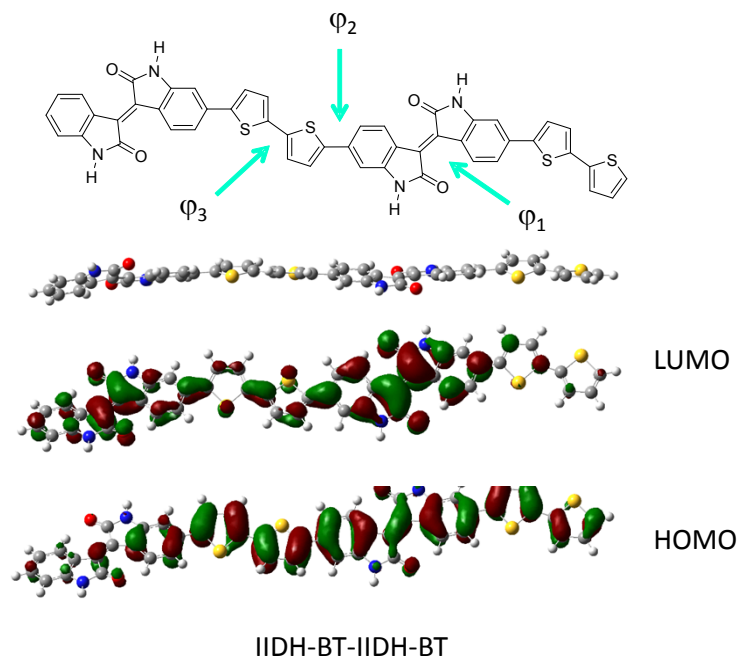

**Figure S3.** The chemical structure, geometry, LUMO orbital, and HOMO orbital of a model dimer IIDH-BT-IIDH-BT obtained by performing density functional theory (DFT) calculations with B3LYP 6-31G\*.

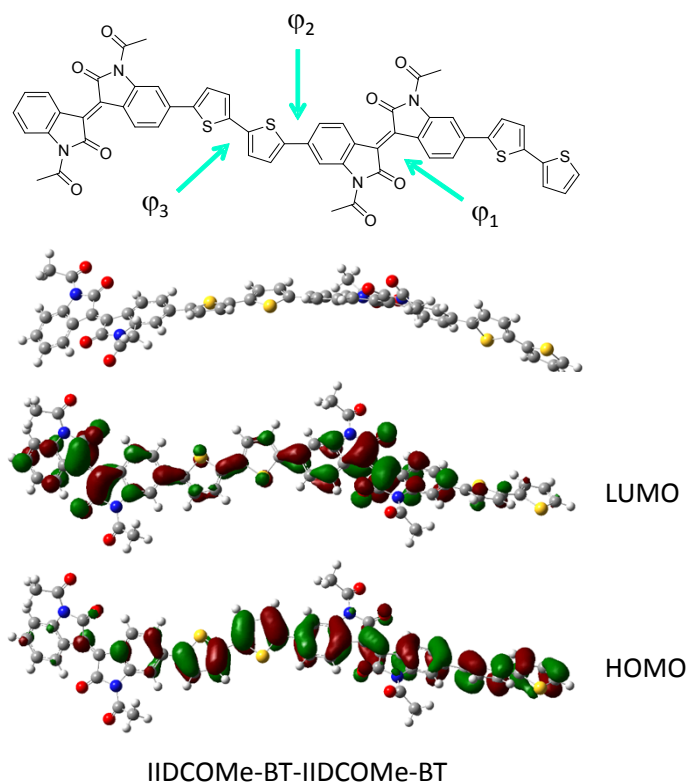

**Figure S4.** The chemical structure, geometry, LUMO orbital, and HOMO orbital of a model dimer IIDCOMe-BT-IDCOMe-BT obtained by performing density functional theory (DFT) calculations with B3LYP 6-31G\*.

## Supplementary Information

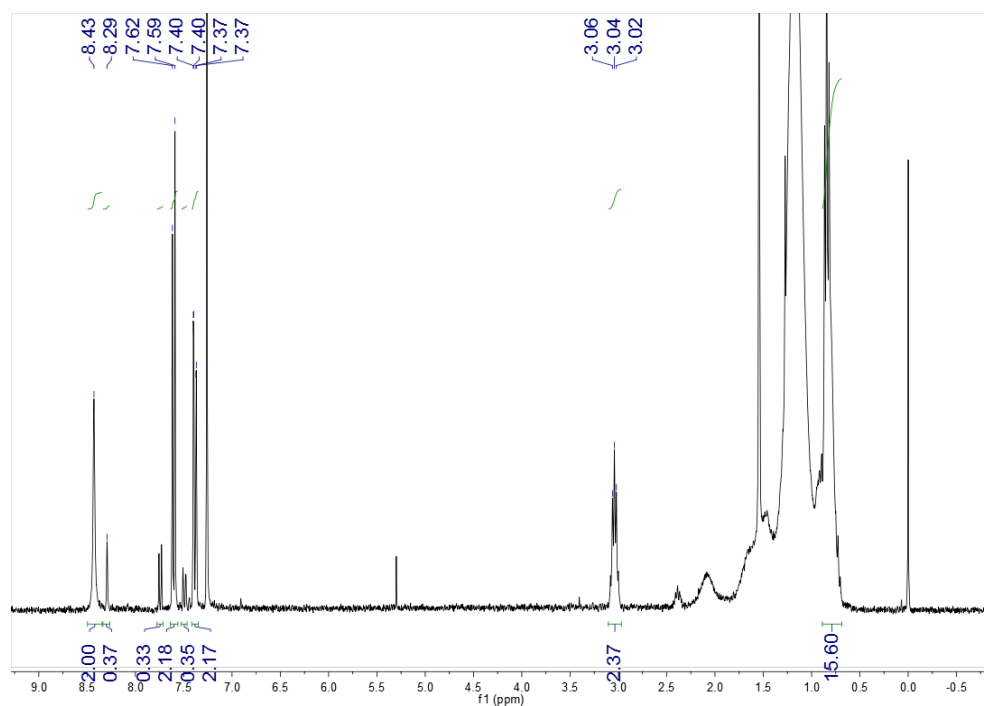

**Figure S5** The 300 MHz <sup>1</sup>H NMR spectrum of 6,6'-dibromo-1,1'-bis(2-hexyldecanoyl)-[2,2'-biindolinylidene]-3,3'-dione (compound **2a**) measured in CDCl<sub>3</sub>.

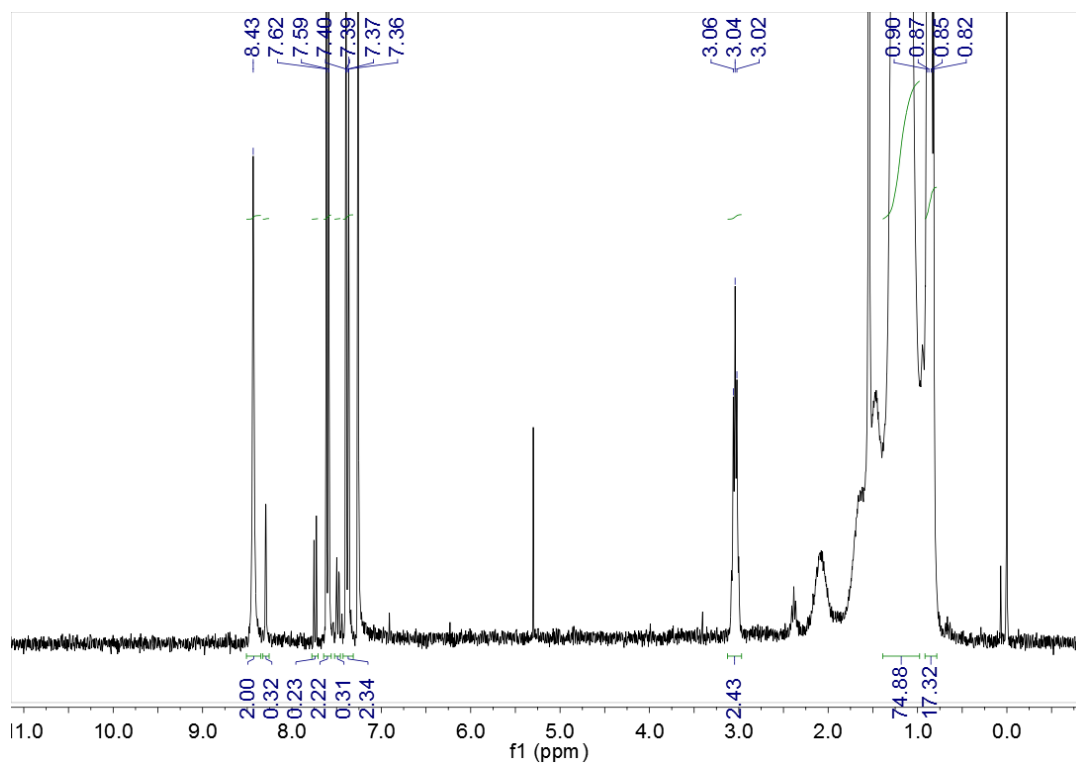

**Figure S6** The 300 MHz <sup>1</sup>H NMR spectrum of 6,6'-dibromo-1,1'-bis(2-octyldecanoyl)-[2,2'-biindolinylidene]-3,3'-dione (compound **2b**) measured in CDCl<sub>3</sub>.

## Supplementary Information

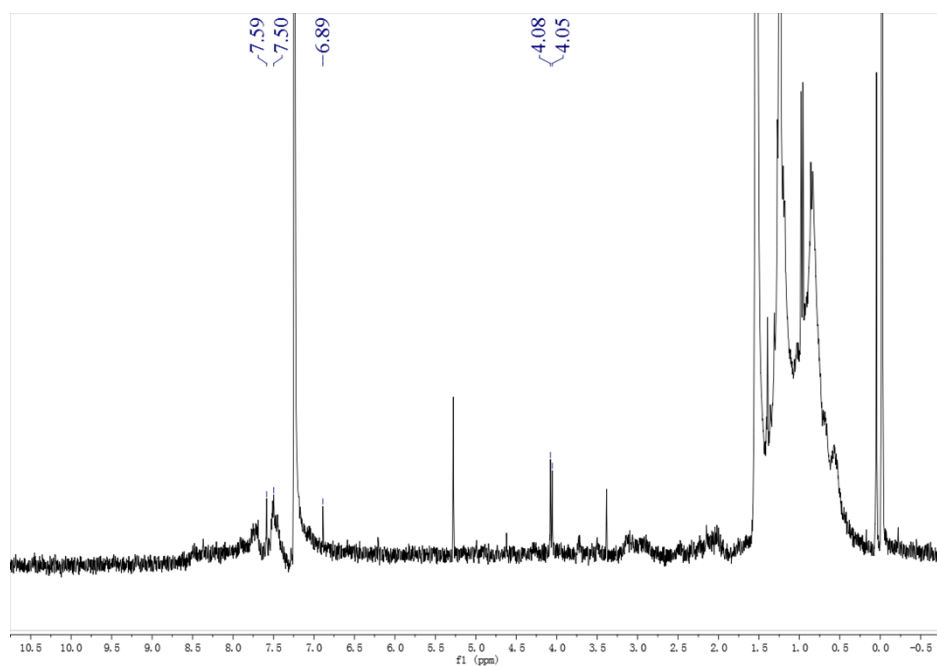

**Figure S7.** The 300 MHz <sup>1</sup>H NMR spectrum of **P1** measured in CDCl<sub>3</sub>.

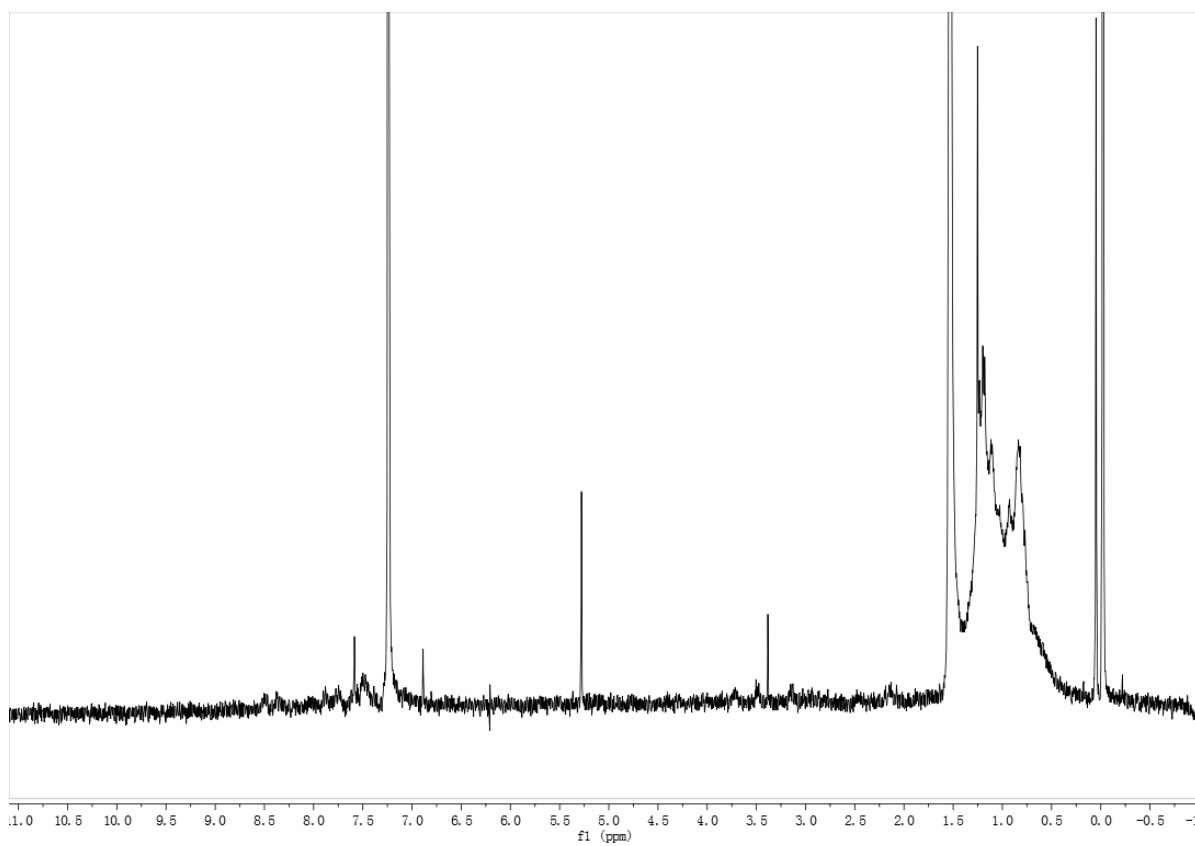

**Figure S8.** The 300 MHz <sup>1</sup>H NMR spectrum of **P2** measured in CDCl<sub>3</sub>.

## Supplementary Information

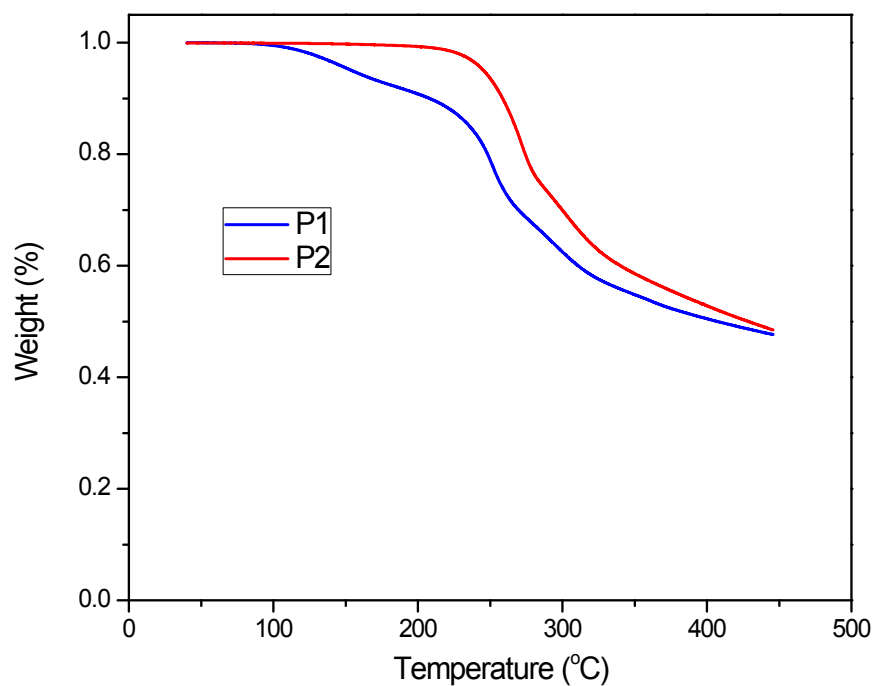

**Figure S9.** TGA curves of **P1** and **P2** with a heating rate of  $10\text{ }^{\circ}\text{C}\cdot\text{min}^{-1}$  under  $\text{N}_2$ .

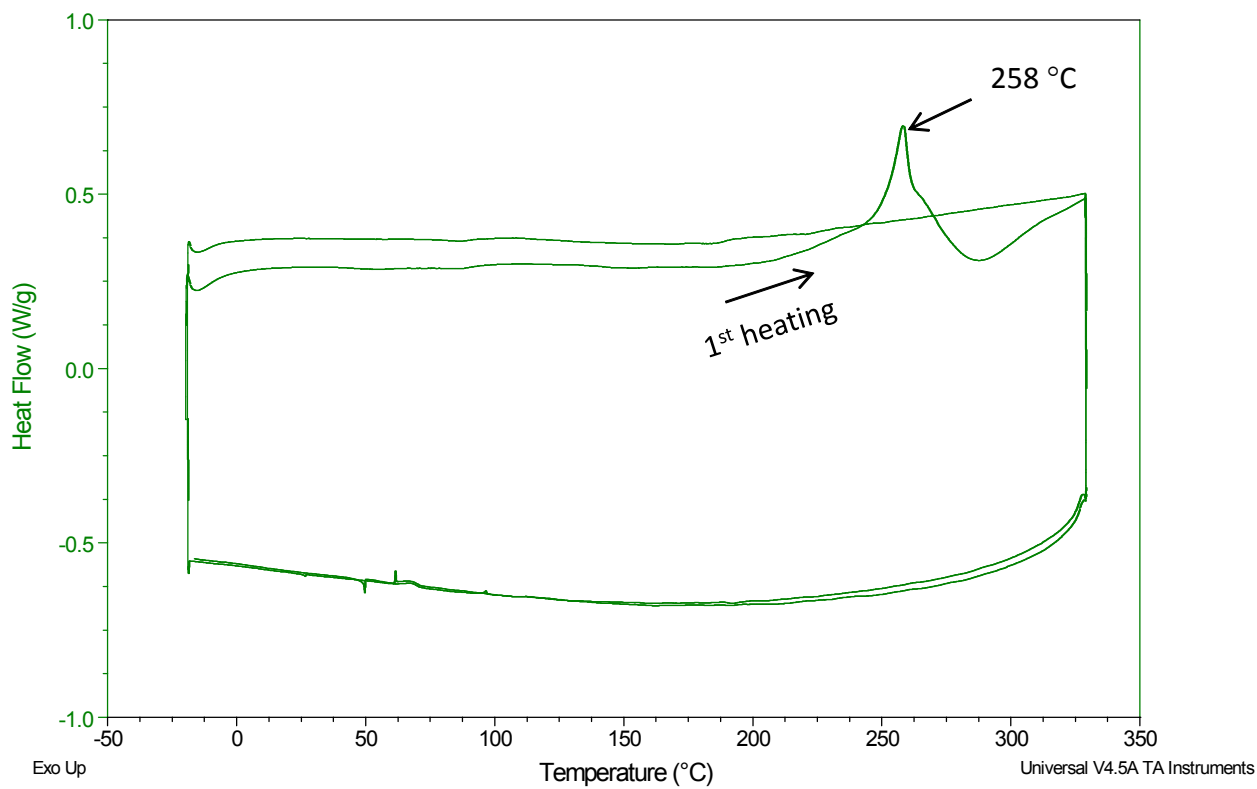

**Figure S10.** DSC curves of **P1** with a heating rate of  $10\text{ }^{\circ}\text{C}\cdot\text{min}^{-1}$  under  $\text{N}_2$ .

## Supplementary Information

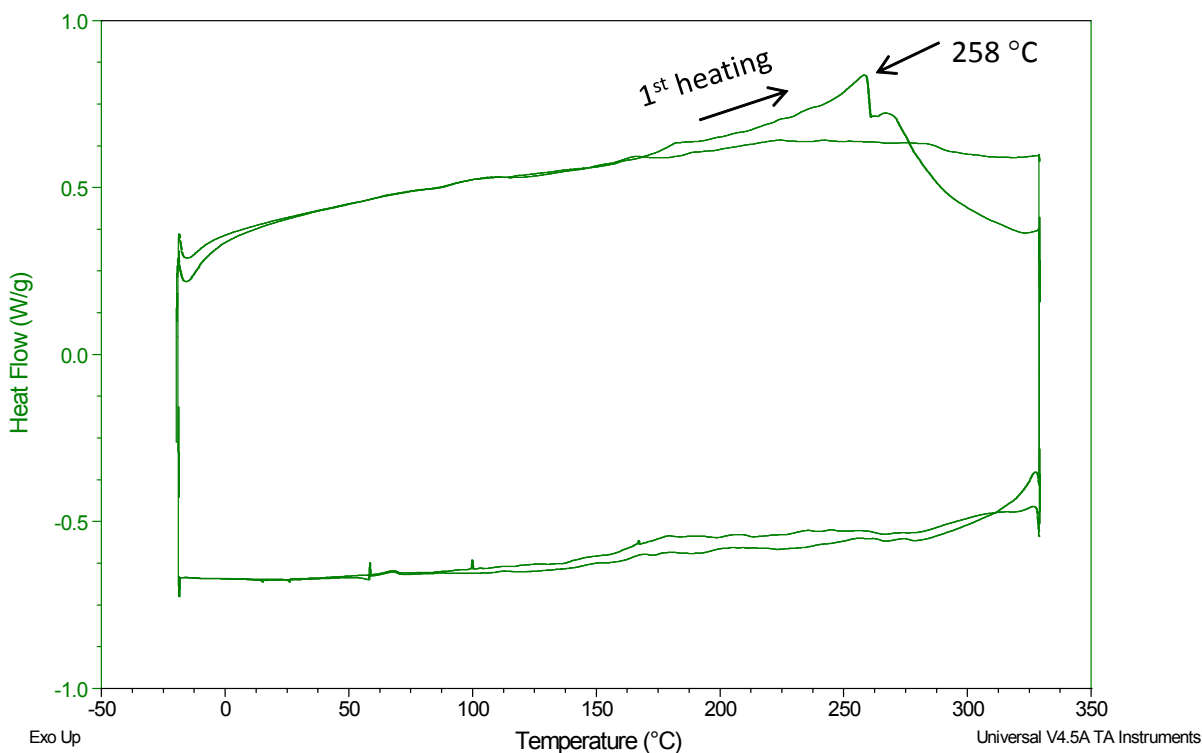

**Figure S11.** DSC curves of **P2** with a heating rate of  $10\text{ }^{\circ}\text{C}\cdot\text{min}^{-1}$  under  $\text{N}_2$ .

### 3. References

1. (a) A. D. Becke, *Phys. Rev. A*, 1988, **38**, 3098. (b) C. Lee, W. Yang and G. G. Parr, *Phys. Rev. B*, 1988, **37**, 785.
2. Æ. Frisch, H. P. Hratchian, R. D. Dennington II, T. A. Keith, J. Millam, A. B. Nielsen, A. J. Holder and J. Hiscocks, *GaussView 5 Reference*, Gaussian, Inc., Wallingford, CT, 2009.
3. (a) Æ. Frisch, *Gaussian 09W Reference*, Gaussian, Inc., Wallingford, CT, 2009. (b) *Gaussian 09, Revision B.01*, M. J. Frisch, G. W. Trucks, H. B. Schlegel, G. E. Scuseria, M. A. Robb, J. R. Cheeseman, G. Scalmani, V. Barone, B. Mennucci, G. A. Petersson, H. Nakatsuji, M. Caricato, X. Li, H. P. Hratchian, A. F. Izmaylov, J. Bloino, G. Zheng, J. L. Sonnenberg, M. Hada, M. Ehara, K. Toyota, R. Fukuda, J. Hasegawa, M. Ishida, T. Nakajima, Y. Honda, O. Kitao, H. Nakai, T. Vreven, J. A. Montgomery, Jr., J. E. Peralta, F. Ogliaro, M. Bearpark, J. J. Heyd, E. Brothers, K. N. Kudin, V. N. Staroverov, R. Kobayashi, J. Normand, K. Raghavachari, A. Rendell, J. C. Burant, S. S. Iyengar, J. Tomasi, M. Cossi, N. Rega, J. M. Millam, M. Klene, J. E. Knox, J. B. Cross, V. Bakken,



## Supplementary Information

C. Adamo, J. Jaramillo, R. Gomperts, R. E. Stratmann, O. Yazyev, A. J. Austin, R. Cammi, C. Pomelli, J. W. Ochterski, R. L. Martin, K. Morokuma, V. G. Zakrzewski, G. A. Voth, P. Salvador, J. J. Dannenberg, S. Dapprich, A. D. Daniels, Ö. Farkas, J. B. Foresman, J. V. Ortiz, J. Cioslowski and D. J. Fox, Gaussian, Inc., Wallingford CT, 2009.
